# Supplementary material for: Flavonoids with inhibitory activity against SARS-CoV-2 3CLpro
Source: PubMed Central journal article supplement (PMC7470085; doi:10.1080/14756366.2020.1801672), 2020-08-04
Supplement: IENZ_A_1801672_SM6712.pdf [file IENZ_A_1801672_SM6712.pdf]

**Supplementary Table 1. A flavonoid library**

| No   | Name of compound    | No   | Name of compound             |
|------|---------------------|------|------------------------------|
| 1-1  | Daidzein            | 4-12 | Myricitrin                   |
| 1-2  | Genistein           | 4-13 | Kaempferide                  |
| 1-3  | Genistin            | 4-14 | Galangin                     |
| 1-4  | Ipriflavone         | 4-15 | Chrysin                      |
| 1-5  | Puerarin            | 4-16 | Wogonin                      |
| 2-1  | Glabridin           | 5-1  | (-)-Galocatechin             |
| 3-1  | Baicalein           | 5-2  | (±)-Epigallocatechin gallate |
| 3-2  | Diosmin             | 5-3  | (-)-Epicatechin              |
| 3-3  | Diosmetin           | 5-4  | (±)-Catechin                 |
| 3-4  | Skullcapflavone II  | 5-5  | (-)-Galocatechin gallate     |
| 3-5  | beta-Naphthoflavone | 5-6  | (-) Catechin gallate         |
| 3-6  | Orientin            | 5-7  | (+)-Catechin hydrate         |
| 3-7  | Acacetin            | 6-1  | Hesperidin                   |
| 3-8  | Baicalin            | 6-2  | Naringenin                   |
| 3-9  | Rhoifolin           | 6-3  | Sakuranetin                  |
| 3-10 | Hispidulin          | 6-4  | Naringin                     |
| 3-11 | Sinensetin          | 6-5  | Poncirin                     |
| 3-12 | Oroxin B            | 6-6  | Bavachin                     |
| 3-13 | Pectolarin          | 6-7  | Flavanone                    |
| 3-14 | Cirsiliol           | 7-1  | (±)-Taxifolin hydrate        |
| 3-15 | Homoplantagin       | 7-2  | Silibinin                    |
| 3-16 | Amentoflavone       | 7-3  | Astilbin                     |
| 3-17 | Luteolin            | 7-4  | Silymarin                    |
| 3-18 | Apigenin            | 8-1  | Isoxanthohumol               |
| 4-1  | Herbacetin          | 9-1  | Isobavachalcone              |
| 4-2  | Kaempferol          | 9-2  | 2,2',4'-Trihydroxychalcone   |
| 4-3  | Morin               | 9-3  | Dienestrol                   |
| 4-4  | Myricetin           | 9-4  | Sofalcone                    |
| 4-5  | Fisetin             | 9-5  | Rhodamine 6G                 |
| 4-6  | Quercitrin          | 9-6  | FCLA Free Acid               |
| 4-7  | Quercetin           | 9-7  | Helichrysetin                |

|      |                                    |      |                               |
|------|------------------------------------|------|-------------------------------|
| 4-8  | Quercetin 3-β-D-glucoside          | 9-8  | Cardamonin                    |
| 4-9  | Kaempferol 7-O-β-D-glucopyranoside | 9-9  | Neohesperidin dihydrochalcone |
| 4-10 | Rutin                              | 10-1 | Mangiferin                    |
| 4-11 | Icaritin                           | 10-2 | Auraptene                     |

\*Isoflavone;1-1~5, Isoflavane;2-1, Flavone;3-1~18, Flavonol;4-1~16, Flavanol;5-1~7, Flavanone;6-1~7, Flavanonl;7-1~4, Prenylflavonoid;8-1, Chalcone;9-1~9, unclassified;10-1~2
